# Supplementary material
Source: Research Square preprint supplement (doi:10.21203/rs.3.rs-10052995/v1)
Supplement: Supplementary file 1 [file e37315753dd358e20ccc26b4.docx]

# Supporting Information

***Table S1.*** *Species-specific biological sampling effort on King George Island, South Shetland Islands, Antarctica, across the 2022/23, 2023/24, and 2024/25 breeding seasons. Values indicate numbers of live and dead birds sampled, serum samples collected for serological analyses, and swab samples collected for virological screening.*

|  | ***2022/23*** | | | | ***2023/24*** | | | | ***2024/25*** | | | |
| --- | --- | --- | --- | --- | --- | --- | --- | --- | --- | --- | --- | --- |
| ***Species*** | ***Live*** | ***Dead*** | ***Serum*** | ***Swab*** | ***Live*** | ***Dead*** | ***Serum*** | ***Swab*** | ***Live*** | ***Dead*** | ***Serum*** | ***Swab*** |
| *Adélie Penguin* | *25* | *0* | *17* | *25* | *9* | *0* | *0* | *9* | *0* | *0* | *0* | *0* |
| *Brown Skua* | *33* | *0* | *32* | *33* | *27* | *1* | *0* | *28* | *26* | *15* | *0* | *41* |
| *Chinstrap Penguin* | *25* | *0* | *25* | *25* | *15* | *0* | *15* | *15* | *1* | *2* | *0* | *3* |
| *Gentoo Penguin* | *25* | *0* | *25* | *25* | *43* | *0* | *43* | *43* | *109* | *2* | *0* | *111* |
| *Southern Giant Petrel* | *15* | *0* | *15* | *15* | *33* | *0* | *0* | *33* | *21* | *6* | *0* | *27* |
| *South Polar Skua* | *30* | *0* | *30* | *30* | *53* | *0* | *0* | *37* | *28* | *0* | *0* | *26* |

***Table S2.*** *Species-specific tracking deployments on King George Island, South Shetland Islands, Antarctica, across the 2022/23, 2023/24, and 2024/25 breeding seasons. Values indicate numbers of GPS devices and light-level geolocators (GLS) deployed on focal seabird species. * GLS retrieved.*

|  | ***2022/23*** | | ***2023/24*** | | ***2024/25*** | |
| --- | --- | --- | --- | --- | --- | --- |
| ***Species*** | ***GPS*** | ***GLS*** | ***GPS*** | ***GLS*** | ***GPS*** | ***GLS**** |
| *Adélie Penguin* | *0* | *0* | *0* | *0* | *0* | *0* |
| *Brown Skua* | *0* | *0* | *10* | *30* | *9* | *10* |
| *Chinstrap Penguin* | *0* | *0* | *0* | *0* | *0* | *0* |
| *Gentoo Penguin* | *0* | *0* | *0* | *0* | *0* | *0* |
| *Southern Giant Petrel* | *0* | *0* | *12* | *30* | *8* | *10* |
| *South Polar Skua* | *0* | *0* | *11* | *30* | *11* | *18* |
